# Supplementary material
Source: PubMed Central journal article supplement (PMC5001689)
Supplement: NIHMS777051-supplement-2.pdf [file NIHMS777051-supplement-2.pdf]

----- Forwarded message -----

From: **CodaOptOutForms** <[owaiver@caltech.edu](mailto:owaiver@caltech.edu)>  
Date: Tue, Apr 5, 2016 at 9:58 AM  
Subject: Your Open Access Policy Waiver submission  
To: "Arbabi, Amir" <[amir@caltech.edu](mailto:amir@caltech.edu)>

April 5, 2016

Dear William E. Moerner,

Pursuant to the Open Access Policy adopted by the California Institute of Technology on June 10, 2013 this communication serves to notify you that your request for a waiver of the Open Access license for "Removing Orientation-Induced Localization Biases in Single Molecule Microscopy Using a Broadband Metasurface Mask" in Nature Photonics has been granted. This waiver may not be revoked by the Institute, and the Institute will have no license under the policy unless you choose to relinquish the waiver.

However, please be aware that waiver of the application of the Institute's Open Access license to your article as specified above does not affect public access requirements from funders such as government agencies. If the article is subject to the 2008 NIH Public Access Policy, or any other such policy, you must be sure to reserve rights sufficient to comply with the funders policies when you enter into a publication agreement for the article.

Independent of the waiver, we recommend that you deposit your article in the CaltechAUTHORS repository as suggested in the Open Access Policy. You can do so regardless of the waiver status of the article or any agreement that you may have signed with a publisher. The simplest method for depositing your article is to use the 'simple deposit' at <http://authors.library.caltech.edu/> for the final accepted version of the article or to contact library staff at [library@caltech.edu](mailto:library@caltech.edu).

In cases where you receive a waiver of the policy, the publisher's agreement may provide sufficient rights to allow copies of your article to be made publicly available in the CaltechAUTHORS repository. The publisher may ask that certain conditions be met, some of which the repository can easily accommodate (for example, an embargo period during which the article will not be made publicly available).

Even if you conclude that your article cannot be made publicly available, depositing a copy of your article in the repository is useful for archival and indexing purposes. The bibliographic information will be made available for harvesting and indexing by search engines, such as Google Scholar, creating increased awareness of your article.

If you have any questions about the waiver of this policy, the Policy for Open Access, or depositing in the Caltech repository please visit <http://libguides.caltech.edu/CaltechOAPolicy> or write to [library@caltech.edu](mailto:library@caltech.edu).

Sincerely,

Kristin Antelman  
University Librarian

on behalf of the Provost Office of the California Institute of Technology
